# Supplementary material for: Rapid Synthesis of Noble Metal Colloids by Plasma–Liquid Interactions
Source: MDPI journal article supplement (doi:10.3390/ma17050987), 2024-02-21
Supplement: s1 [file s1]

## **Supporting Information**

### **Rapid synthesis of noble metal colloids by plasma-liquid interactions**

Yuanwen Pang<sup>1</sup>, Hong Li<sup>1,\*</sup>, Yue Hua<sup>1</sup>, Xiuling Zhang<sup>1</sup> and Lanbo Di<sup>1,2,3,\*</sup>

1 College of Physical Science and Technology, Dalian University, Dalian 116622, China

2 State Key Laboratory of Structural Analysis for Industrial Equipment, Dalian University of Technology, Dalian 116024, China

3 Key Laboratory of Advanced Technology for Aerospace Vehicles of Liaoning Province, Dalian University of Technology, Dalian 116024, China

\* Correspondence: lihong10@dlu.edu.cn (H. Li); dilanbo@163.com (L. B. Di).

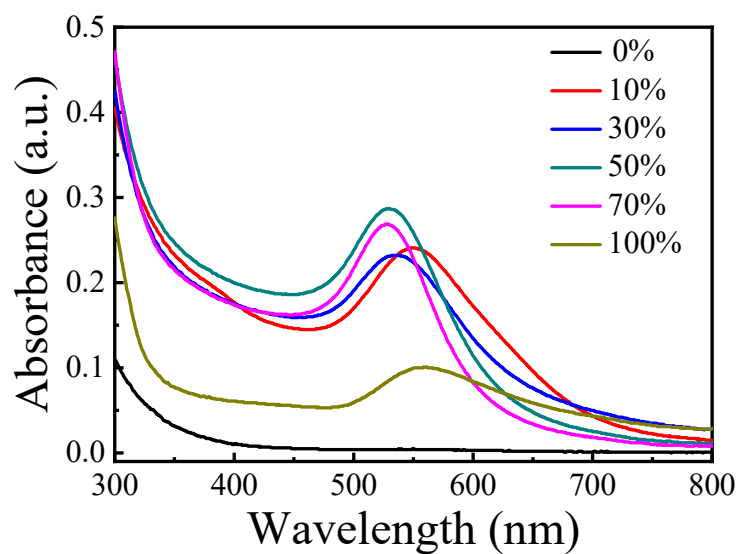

**Figure S1.** UV-Vis absorption spectra of  $\text{HAuCl}_4$  precursor solution reduced with different contents of ethanol under the same plasma treatment condition.

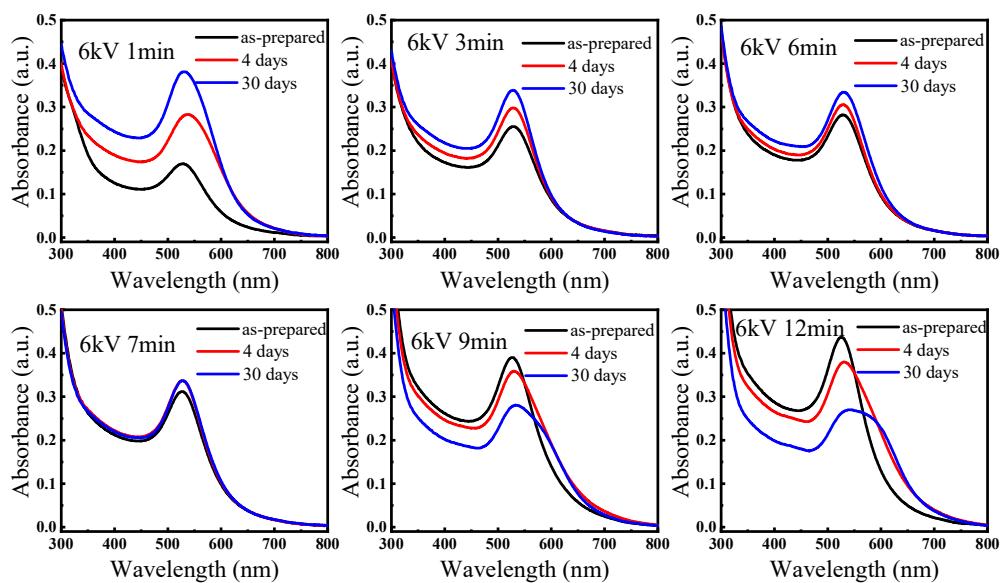

**Figure S2.** Time-dependent UV-Vis absorption spectra of the reduced  $\text{HAuCl}_4$  precursor solution at different discharge times with a discharge voltage of 6 kV and 5% PVP.

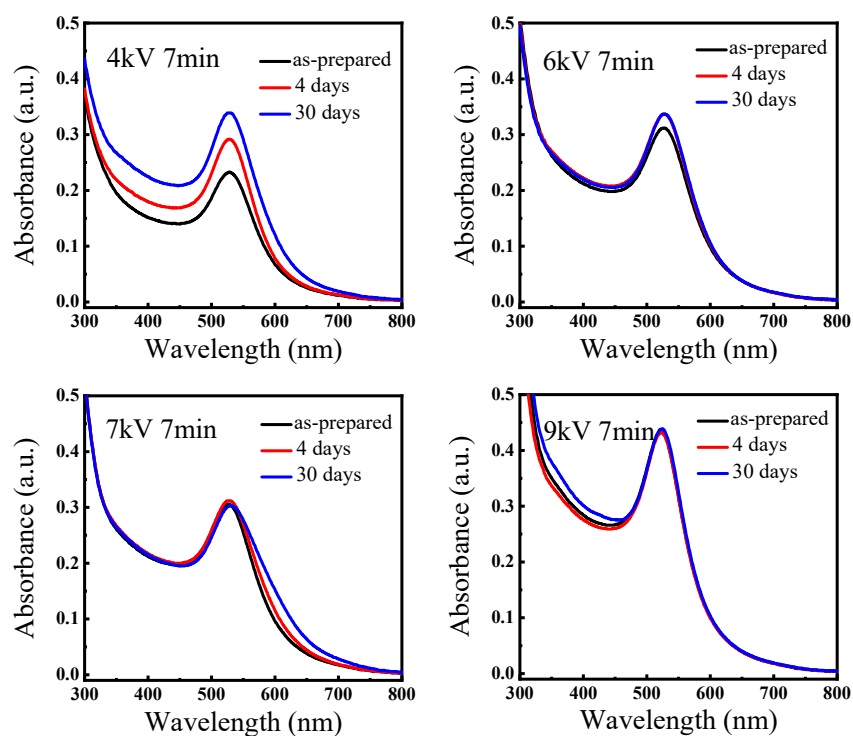

**Figure S3.** Time-dependent UV-Vis absorption spectra of the reduced  $\text{HAuCl}_4$  precursor solution with different discharge voltages at a discharge time of 7 min and 5% PVP.

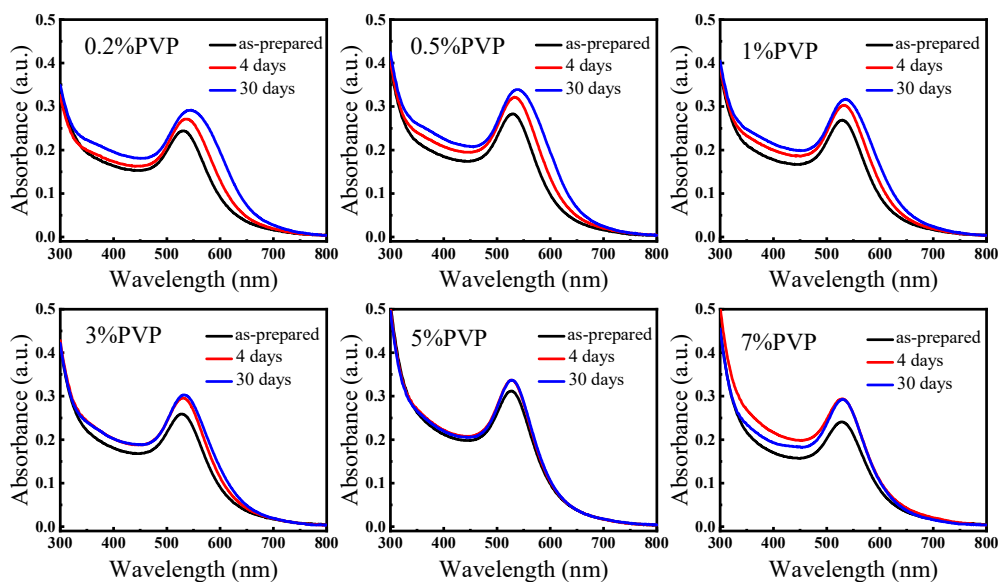

**Figure S4.** Time-dependent UV-Vis absorption spectra of  $\text{HAuCl}_4$  precursor solutions reduced with different contents of PVP at a discharge voltage of 6 kV and a discharge time of 7 min.

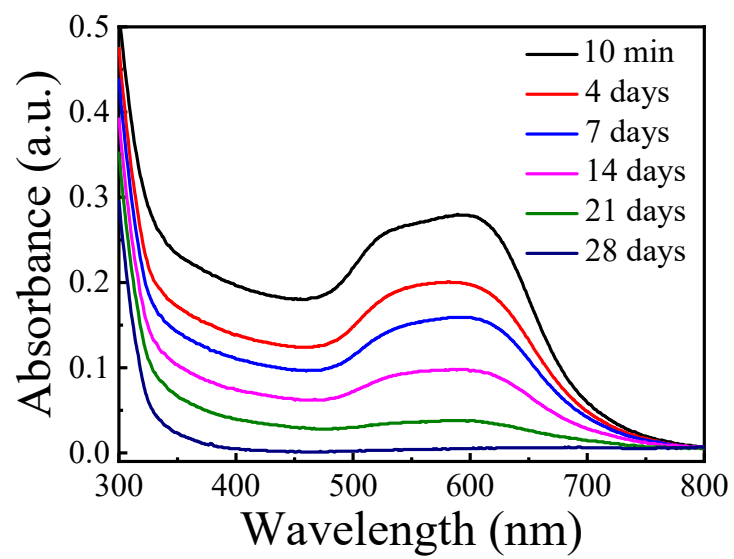

**Figure S5.** UV-Vis absorption spectra of gold colloid solution without PVP protection over time.
